## **Psychiatric Predictors of COVID-19 Outcomes in a Skilled Nursing Facility Cohort**

Steven P. Cercy, Ph.D.

Mental Health Service

VA New York Harbor Healthcare System

Clinical Associate Professor

Departments of Psychiatry and Neurology

New York University School of Medicine

Corresponding author:

Steven P. Cercy

329 E 14th St, Suite 5C

New York, NY 10003

[steven.cercy@nyumc.org](mailto:steven.cercy@nyumc.org)

2

The author has voluntarily withdrawn this manuscript because of questions raised about privacy issues in the conduct of this retrospective chart review. That issue is being contested by the author. Therefore, pending resolution of this matter, the author does not wish this work to be cited as reference for the project. If you have any questions, please contact the corresponding author.
